# Supplementary material for: Rapid solvent-free synthesis of nano-sized ZSM-5 with a low Si/Al ratio at 90 °C
Source: Royal Society of Chemistry journal article supplement (doi:10.1039/d2qi00298a), 2022-01-01
Supplement: d2qi00298a1.pdf [file d2qi00298a1.pdf]

Table S1 Reagents <sup>a</sup> and their source.

| Reagents                                                                                | Supplier                                   |
|-----------------------------------------------------------------------------------------|--------------------------------------------|
| Sodium aluminate ( $\text{Al}_2\text{O}_3 \geq 41$ wt. %)                               | Sinopharm Chemical Reagent Co., Ltd.       |
| Sodium hydroxide ( $\text{NaOH} \geq 98$ wt.%)                                          | Tianjin Kaixin Chemical Industry Co., Ltd. |
| Tetrapropylammonium hydroxide (TPAOH, 25 wt.%)                                          | Zhejiang Kente Catalysts Company Inc.      |
| Fumed silica ( $\text{SiO}_2 > 99$ wt.%)                                                | Shenyang Chemical Reagent Co., Ltd.        |
| Methanol                                                                                | Tianjin Kemiou Chemical Reagent Co., Ltd.  |
| Tetraethyl orthosilicate (TEOS $\geq 98$ wt.%)                                          |                                            |
| Sodium metasilicate nonahydrate ( $\text{Na}_2\text{SiO}_3 \cdot 9\text{H}_2\text{O}$ ) | Tianjin Guangfu Chemical Reagent Co., Ltd. |
| Tetrapropylammonium bromide (TPABr, 98%)                                                |                                            |
| Ammonium chloride ( $\text{NH}_4\text{Cl}$ )                                            |                                            |
| Boehmite ( $\text{Al}_2\text{O}_3 \geq 70$ wt.%)                                        |                                            |

<sup>a</sup> All of them were used without purification.

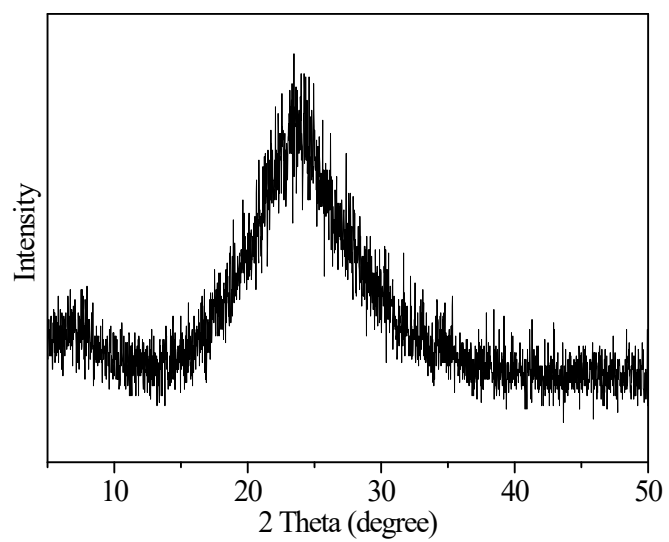

**Fig. S1** XRD pattern of the sample obtained by crystallizing the mixture 20 SiO<sub>2</sub>: 16 Na<sub>2</sub>SiO<sub>3</sub>·9H<sub>2</sub>O: 1.0 boehmite: 3.1 TPABr: 25.5 NH<sub>4</sub>Cl at 90 °C for 72 h.

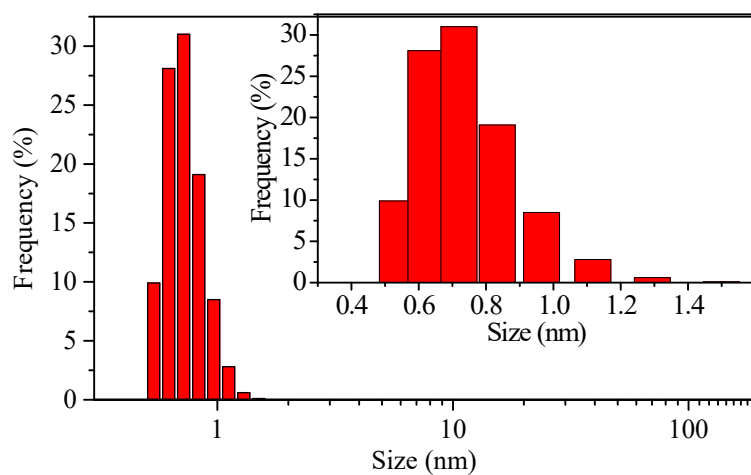

**Fig. S2** The particle size distribution of liquid seed detected by DLS in logarithmic coordinate or uniform coordinate (insert).

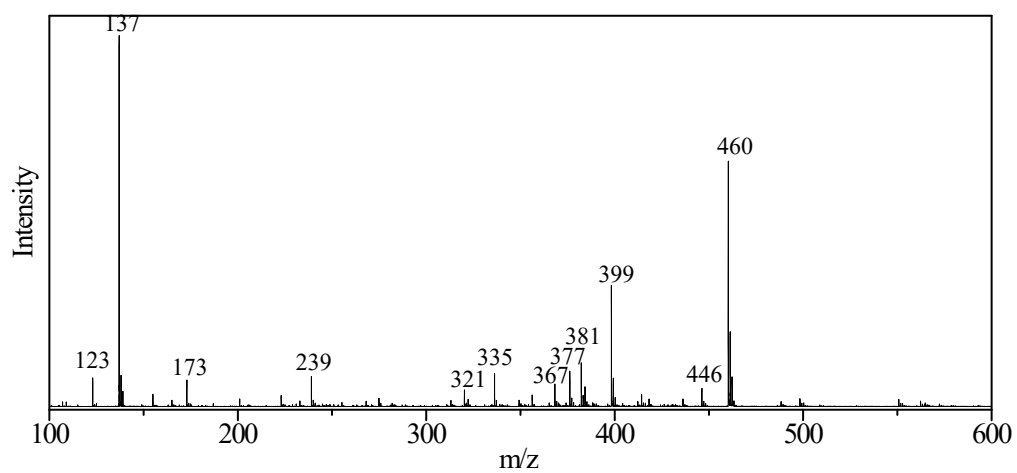

**Fig. S3** ESI-MS spectrum of the liquid seed.

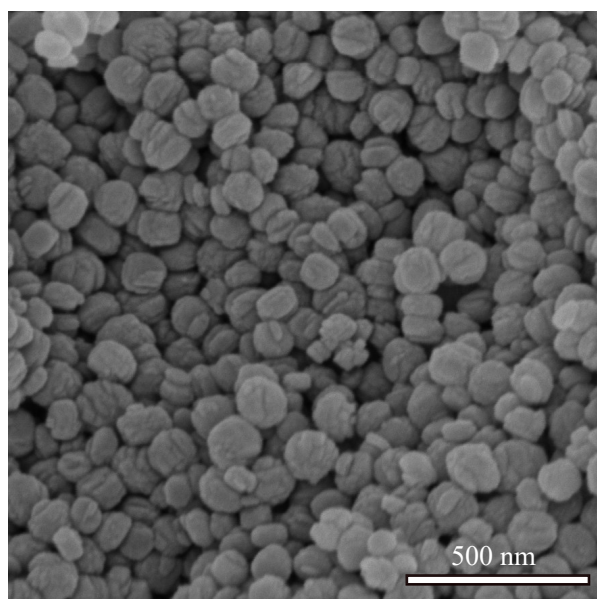

**Fig. S4** SEM image of the S-1 crystals used as solid seed.

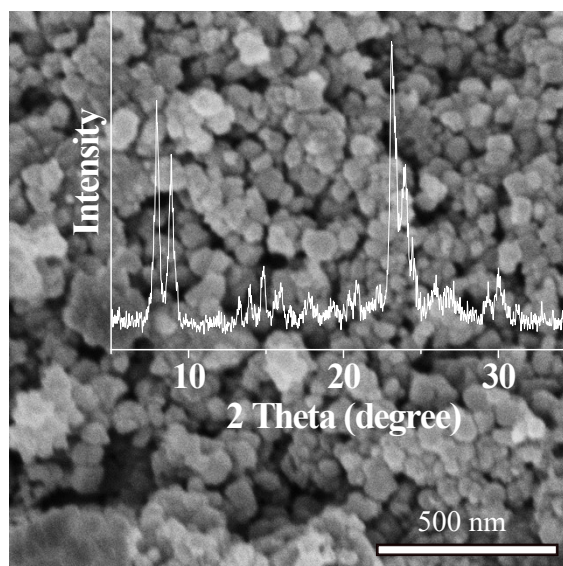

**Fig. S5** XRD pattern and the crystal SEM image of the Z4-48-36.

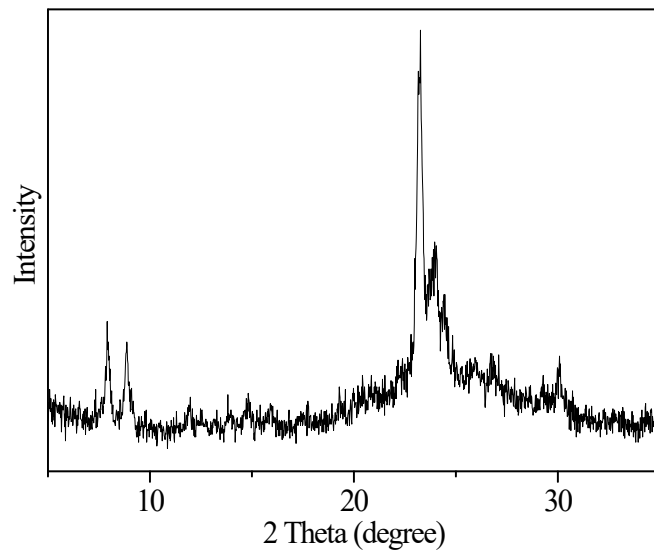

**Fig. S6** XRD pattern of the Z1-120-28.
